# Supplementary material
Source: publisher figshare collection journal article supplement (https://acs.figshare.com/ndownloader/files/3613821)
Supplement: Supplementary file 1 [file 3613821]

data_PEN_beta_C2m
_audit_creation_method         'generated by CrystalMaker 8.7.6'
_cell_length_a                  10.5600(0)
_cell_length_b                   6.7400(0)
_cell_length_c                  13.2500(0)
_cell_angle_alpha               90.0000(0)
_cell_angle_beta               143.0000(0)
_cell_angle_gamma               90.0000(0)


loop_
_symmetry_equiv_pos_as_xyz
'+x,+y,+z'
'1/2+x,1/2+y,+z'
'-x,+y,-z'
'1/2-x,1/2+y,-z'
'-x,-y,-z'
'1/2-x,1/2-y,-z'
'+x,-y,+z'
'1/2+x,1/2-y,+z'

loop_
_atom_site_label
_atom_site_type_symbol
_atom_site_occupancy
_atom_site_fract_x
_atom_site_fract_y
_atom_site_fract_z
    C3    C  1.0000      0.8922    0.0000    0.9236
    C5    C  1.0000      0.2445    0.0000    0.0820
   C11    C  1.0000      0.8138    0.0000    0.7762
   C13    C  1.0000      0.0498    0.0000    0.2185
   C14    C  1.0000      0.1657    0.0000    0.9344
   C18    C  1.0000      0.8697    0.0000    0.6331
   C22    C  1.0000      0.4119    0.5000    0.4814
   H15    H  1.0000      0.5962    0.0000    0.8066
   H16    H  1.0000      0.6573    0.0000    0.6642
   H17    H  1.0000      0.7699    0.5000    0.9415
   H27    H  1.0000      0.8150    0.1312    0.4067
   O20    O  1.0000      0.6762    0.0000    0.4937
   O28    O  1.0000      0.0012    0.0000    0.3639
